# Supplementary material for: Polymerization of methyl methacrylate by latent pre-catalysts based on CO2-protected N-heterocyclic carbenes
Source: Royal Society of Chemistry journal article supplement (doi:10.1039/c3py00073g), 2013-01-01
Supplement: c3py00073g.pdf [file c3py00073g.pdf]

## Supporting Information

to

### Polymerization of Methyl Methacrylate by Latent Pre-Catalysts Based on CO<sub>2</sub>-Protected N-Heterocyclic Carbenes

Stefan Naumann<sup>1</sup>, Friedrich Georg Schmidt<sup>2</sup>, Roman Schowner<sup>1</sup>, Wolfgang Frey<sup>3</sup>, and

Michael R. Buchmeiser<sup>1,4\*</sup>

**Table S1.** Polymerization results for MMA obtained with different imidazolinium- and imidazolium-2-carboxylates in the presence of DMSO. All polymerizations [NHC]:[MMA]=1:280.  $M_n(\text{theor.})$  for PMMA= 28,000 g/mol.

| #               | initiator              | T<br>[°C] | t<br>[h] | MMA:DMSO<br>[vol:vol] | Yield<br>[%] | $M_n$ (PDI) <sup>a)</sup><br>[g/mol] |
|-----------------|------------------------|-----------|----------|-----------------------|--------------|--------------------------------------|
| 1               | 5-iPr-CO <sub>2</sub>  | 50        | 18       | 1:1                   | 0            | -                                    |
| 2               | 5-tBu-CO <sub>2</sub>  | 85        | 19       | 1:1                   | 40           | 12 000 (1.66)                        |
| 3               | 5-tBu-CO <sub>2</sub>  | 85        | 20       | 1:0                   | 61           | >2000 000                            |
| 4               | 5s-tBu-CO <sub>2</sub> | 85        | 25       | 1:0.5                 | 22           | 12 000 (2.1)                         |
| 5               | 5s-tBu-CO <sub>2</sub> | 85        | 24       | 1:0                   | 4            | -                                    |
| 6 <sup>b)</sup> | 5-Cy-CO <sub>2</sub>   | 85        | 24       | 1:0.3                 | 6            | 10 000 (1.78)                        |
| 7               | 5-Ad-CO <sub>2</sub>   | 50        | 6        | 1:0.6                 | 0            | -                                    |
| 8 <sup>c)</sup> | 5-Mes-CO <sub>2</sub>  | 50        | 21       | 1:0.9                 | 18           | -                                    |
| 9 <sup>c)</sup> | 5-Mes-CO <sub>2</sub>  | 75        | 2        | 1:0.8                 | 7            | -                                    |

a) UV detector; b) oligomeric peaks detected; c) ill defined GPC results.

**Table S2.** Polymerization results for **5-tBu-CO<sub>2</sub>/MMA/DMSO**. All polymerizations [NHC]:[MMA]=1:280.  $M_n(\text{theor.})$  for PMMA= 28,000 g/mol.

| #                     | T [°C] | t [h] | MMA:DMSO [vol:vol] | Yield [%] | $M_n$ (PDI) <sup>a)</sup> [g/mol] |
|-----------------------|--------|-------|--------------------|-----------|-----------------------------------|
| <b>1<sup>b)</sup></b> | 60     | 18    | 1:0.3              | 32        | 23 000 (1.64)                     |
| <b>2<sup>b)</sup></b> | 85     | 18    | 1:0.3              | 39        | 13 000 (1.66)                     |
| <b>3<sup>b)</sup></b> | 85     | 18    | 1:0.2              | 35        | 18 000 (1.70)                     |
| <b>4</b>              | 85     | 19    | 1:1                | 40        | 12 000 (1.66)                     |
| <b>5</b>              | 85     | 68    | 1:1                | 44        | 14 000 (1.61)                     |
| <b>6<sup>c)</sup></b> | 85     | 18    | 1:1                | 45        | 12 000 (1.67)                     |

a) UV detector; b) oligomeric peaks/bimodal molecular weight distribution; c) [NHC]:[MMA] = 1:140.

**Table S3.** Polymerization results for **5-tBu-CO<sub>2</sub>/MMA/solvent**. All polymerizations [NHC]:[MMA]=1:280.  $M_n(\text{theor.})$  for PMMA= 28,000 g/mol. T=85°C.

| #                     | t [h] | MMA:solvent [vol:vol] | Yield [%] | $M_n$ (PDI) <sup>a)</sup> [g/mol] |
|-----------------------|-------|-----------------------|-----------|-----------------------------------|
| <b>1</b>              | 20    | bulk                  | 61        | ca. 2 000 000                     |
| <b>2</b>              | 21    | toluene, 1:1          | 56        | 420 000 (1.33)                    |
| <b>3</b>              | 68    | toluene, 1:2          | 64        | 350 000 (1.46)                    |
| <b>4</b>              | 69    | toluene, 1:3          | 68        | 240 000 (1.60)                    |
| <b>5<sup>b)</sup></b> | 71    | toluene, 1:4          | 91        | 150 000 (1.85)                    |
| <b>6</b>              | 22    | DME, 1:1              | 32        | 490 000 (1.25)                    |
| <b>7</b>              | 24    | DME, 1:4              | 29        | 200 000 (1.84)                    |
| <b>8</b>              | 22    | THF                   | 5         | n.a.                              |

a) RI detector; b) [NHC]:[MMA] = 1:200.

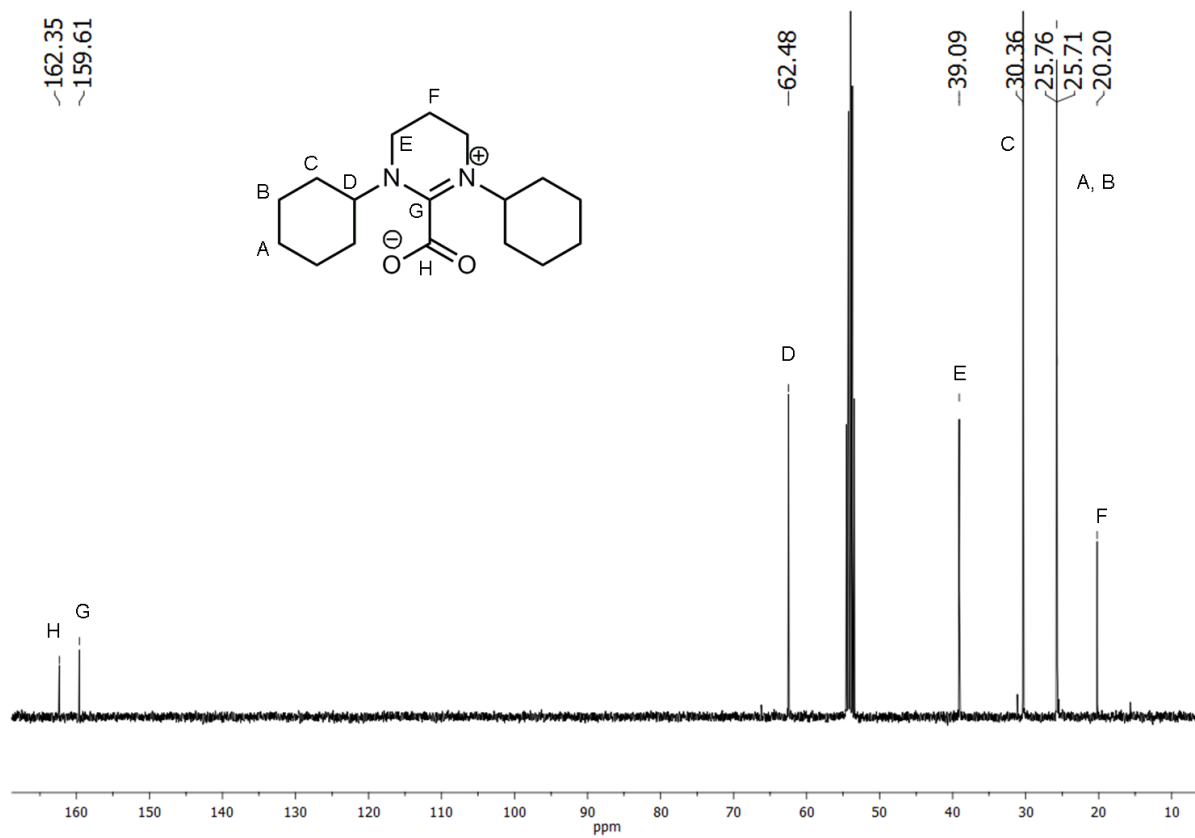

**Figure S1.**  $^{13}\text{C}$ -NMR spectrum of 6-Cy-CO<sub>2</sub> (CD<sub>2</sub>Cl<sub>2</sub>).

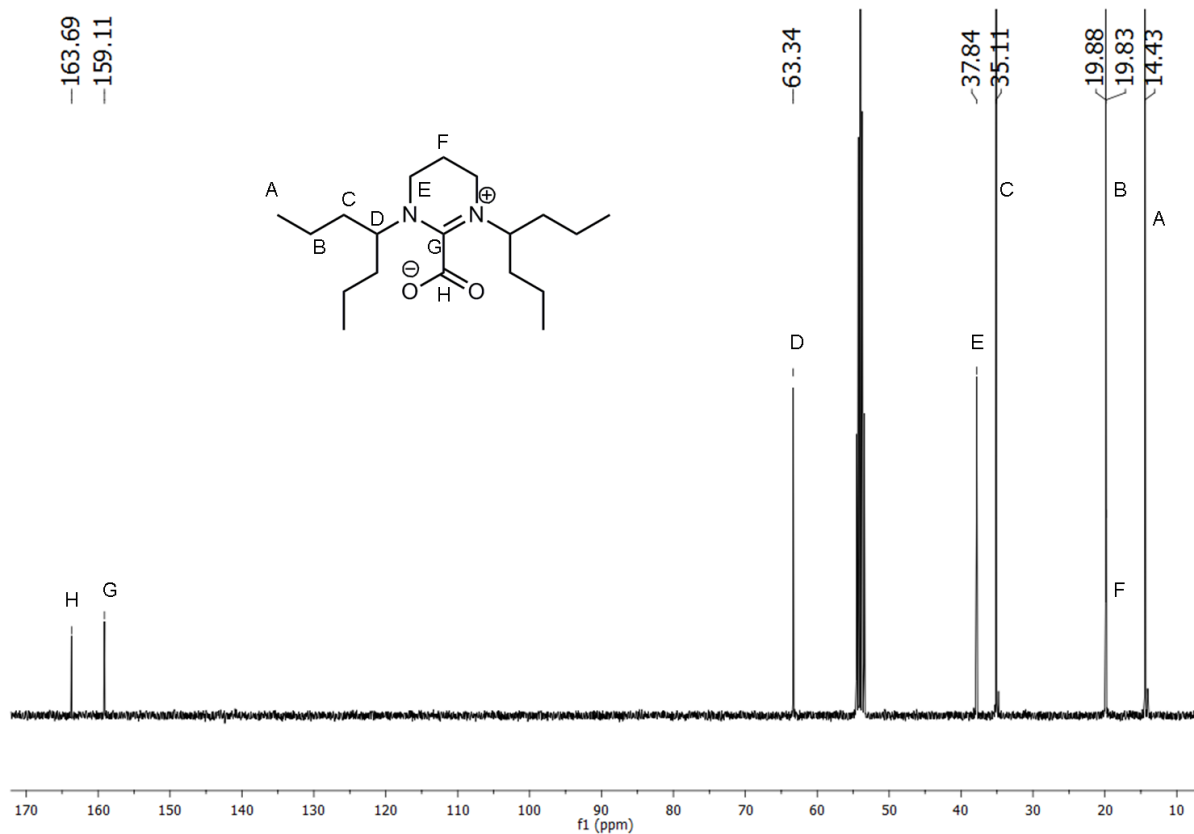

Figure S2.  $^{13}\text{C}$ -NMR spectrum of **6-Hep-CO<sub>2</sub>** ( $\text{CD}_2\text{Cl}_2$ ).

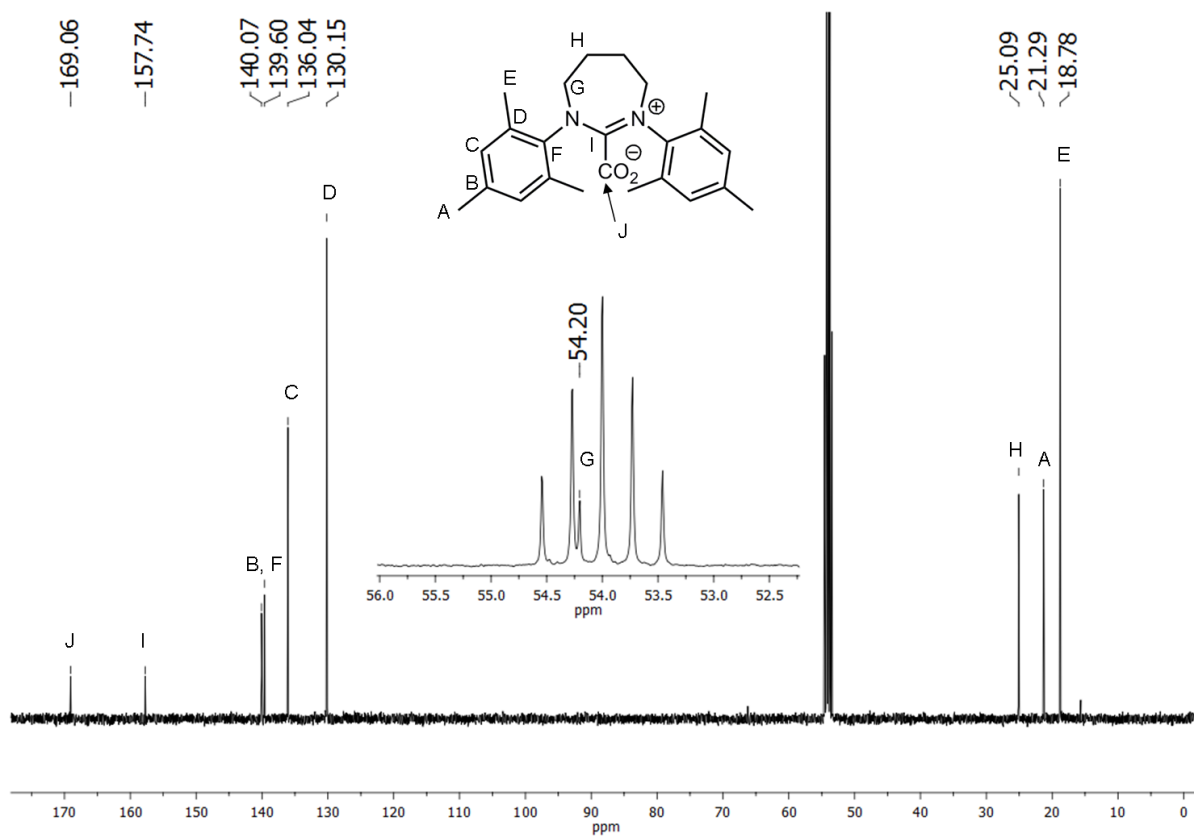

Figure S2.  $^{13}\text{C}$ -NMR spectrum of **7-Mes-CO<sub>2</sub>** ( $\text{CD}_2\text{Cl}_2$ ).

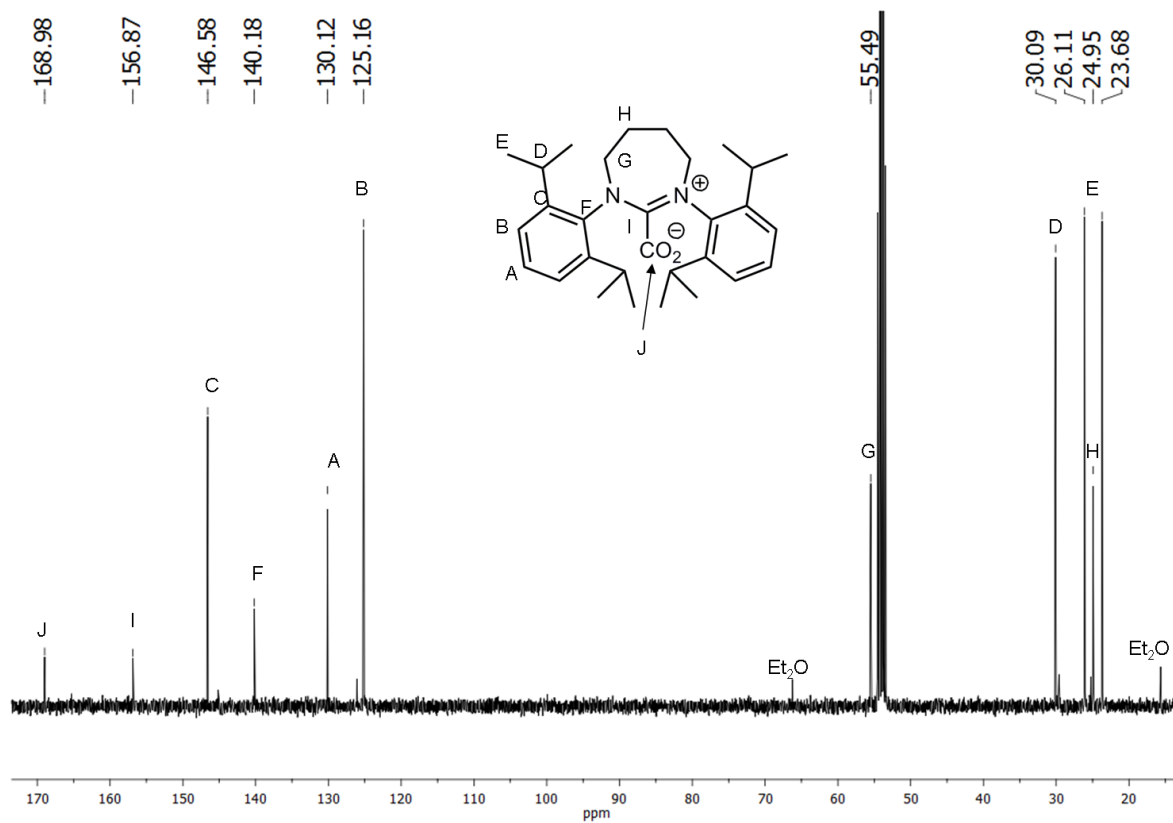

**Figure S4.**  $^{13}\text{C}$ -NMR spectrum of **7-Dipp-CO<sub>2</sub>** ( $\text{CD}_2\text{Cl}_2$ ).

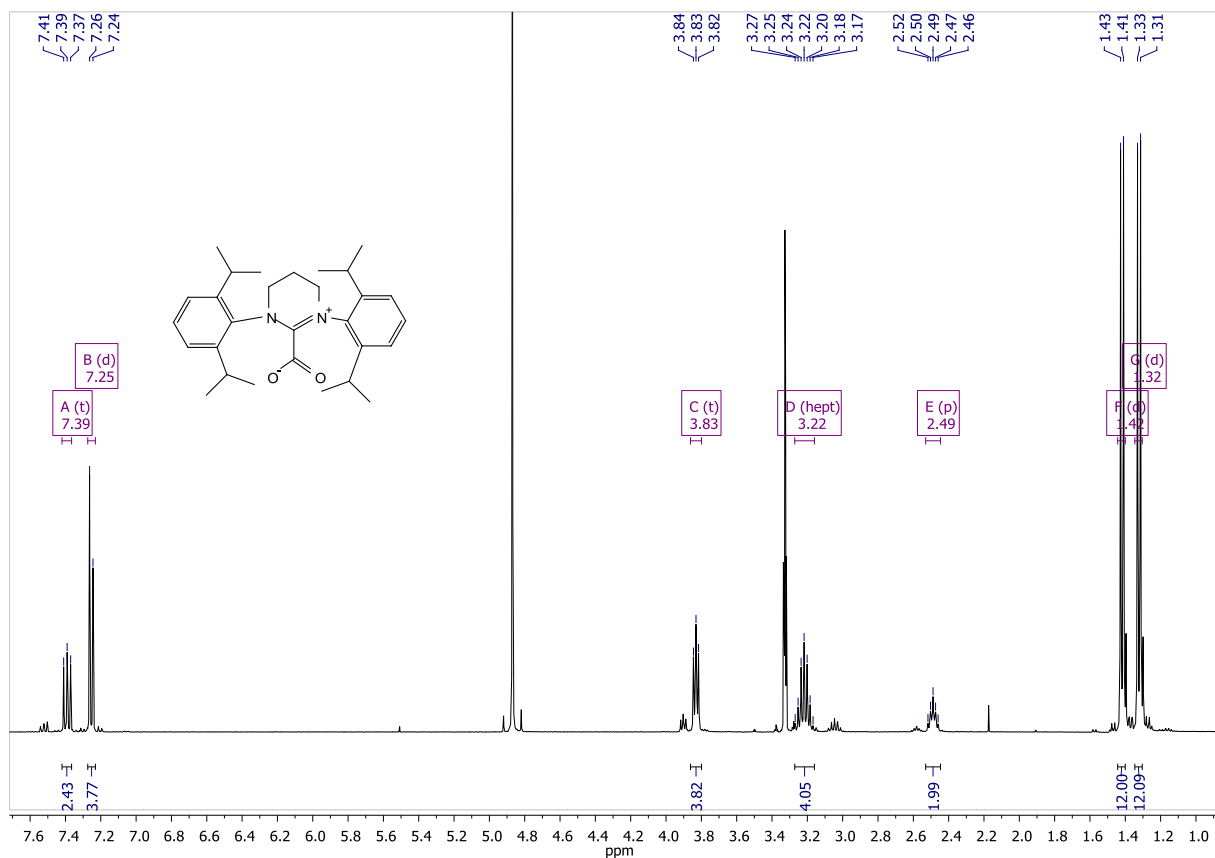

**Figure S5.**  $^1\text{H}$  NMR spectrum ( $\text{CD}_3\text{OD}$ ) of **6-Dipp-CO<sub>2</sub>**.

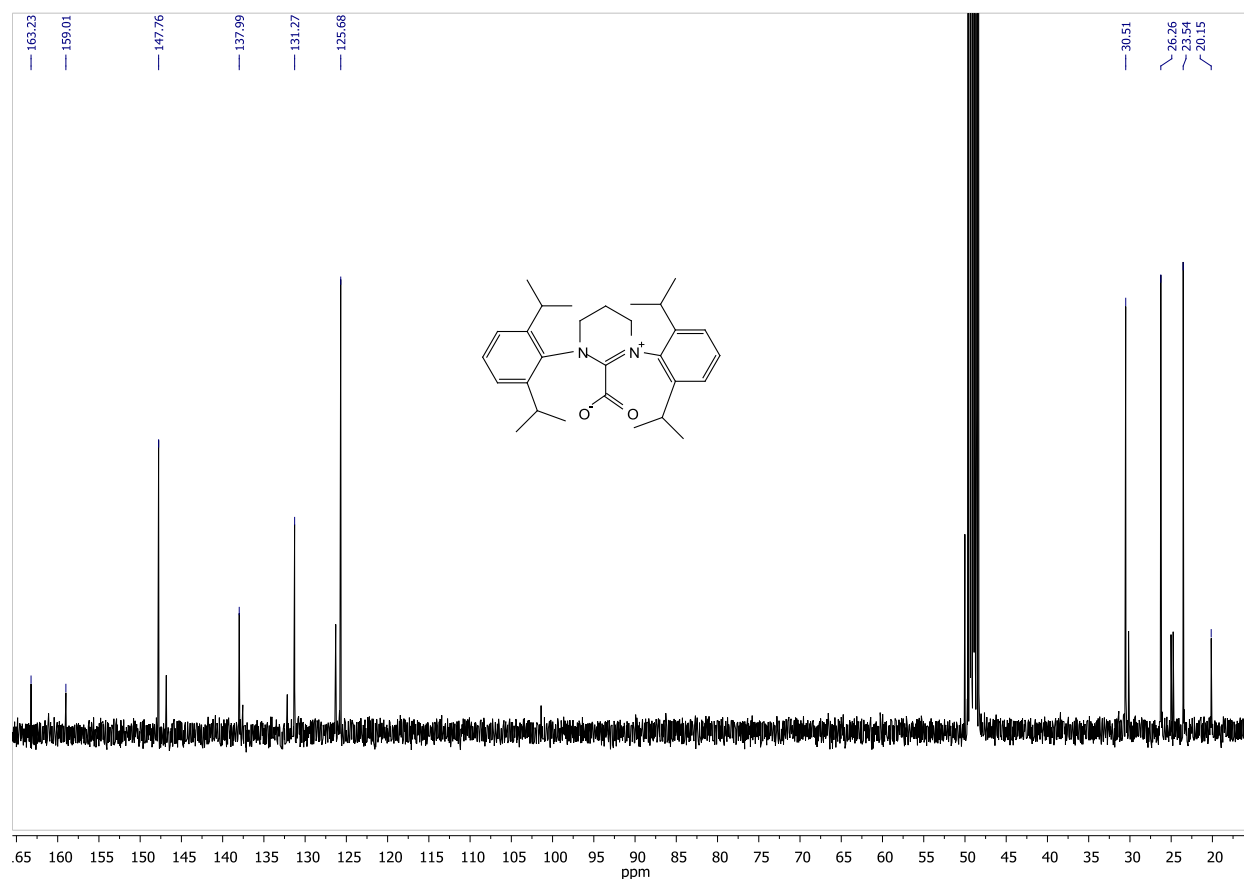

Figure S6. <sup>13</sup>C NMR spectrum (CD<sub>3</sub>OD) of **6-Dipp-CO<sub>2</sub>**.

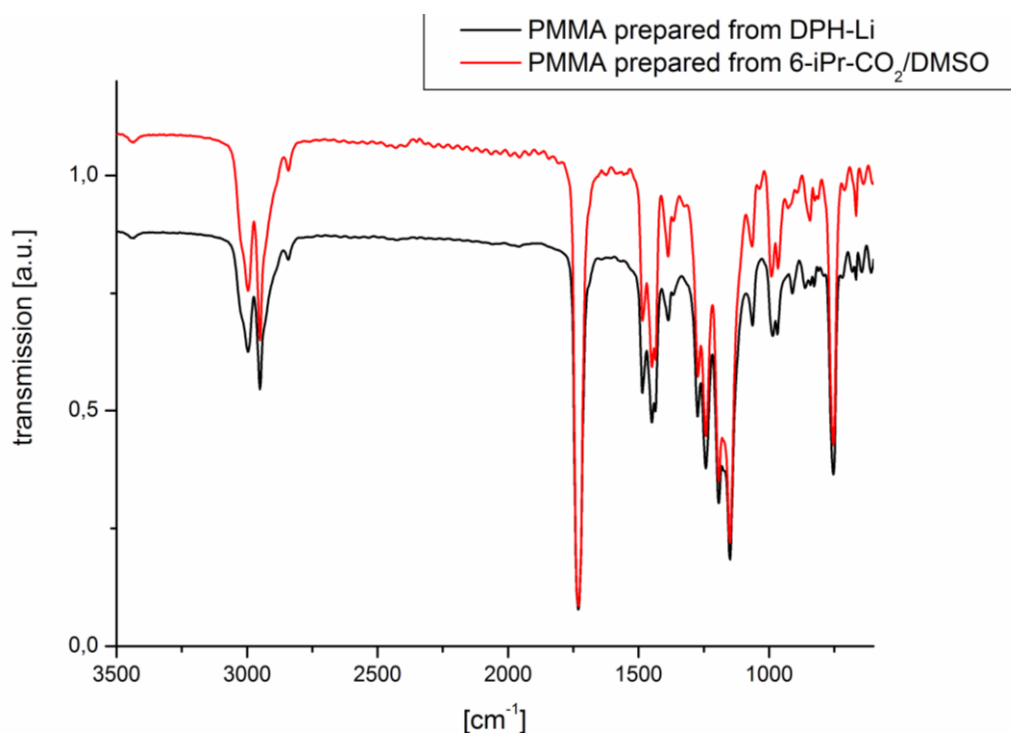

Figure S7. IR-spectra of PMMA obtained via **6-iPr-CO<sub>2</sub>**/DMSO- (red) and DPH-Li (diphenylhexyllithium) triggered (black) anionic polymerization.

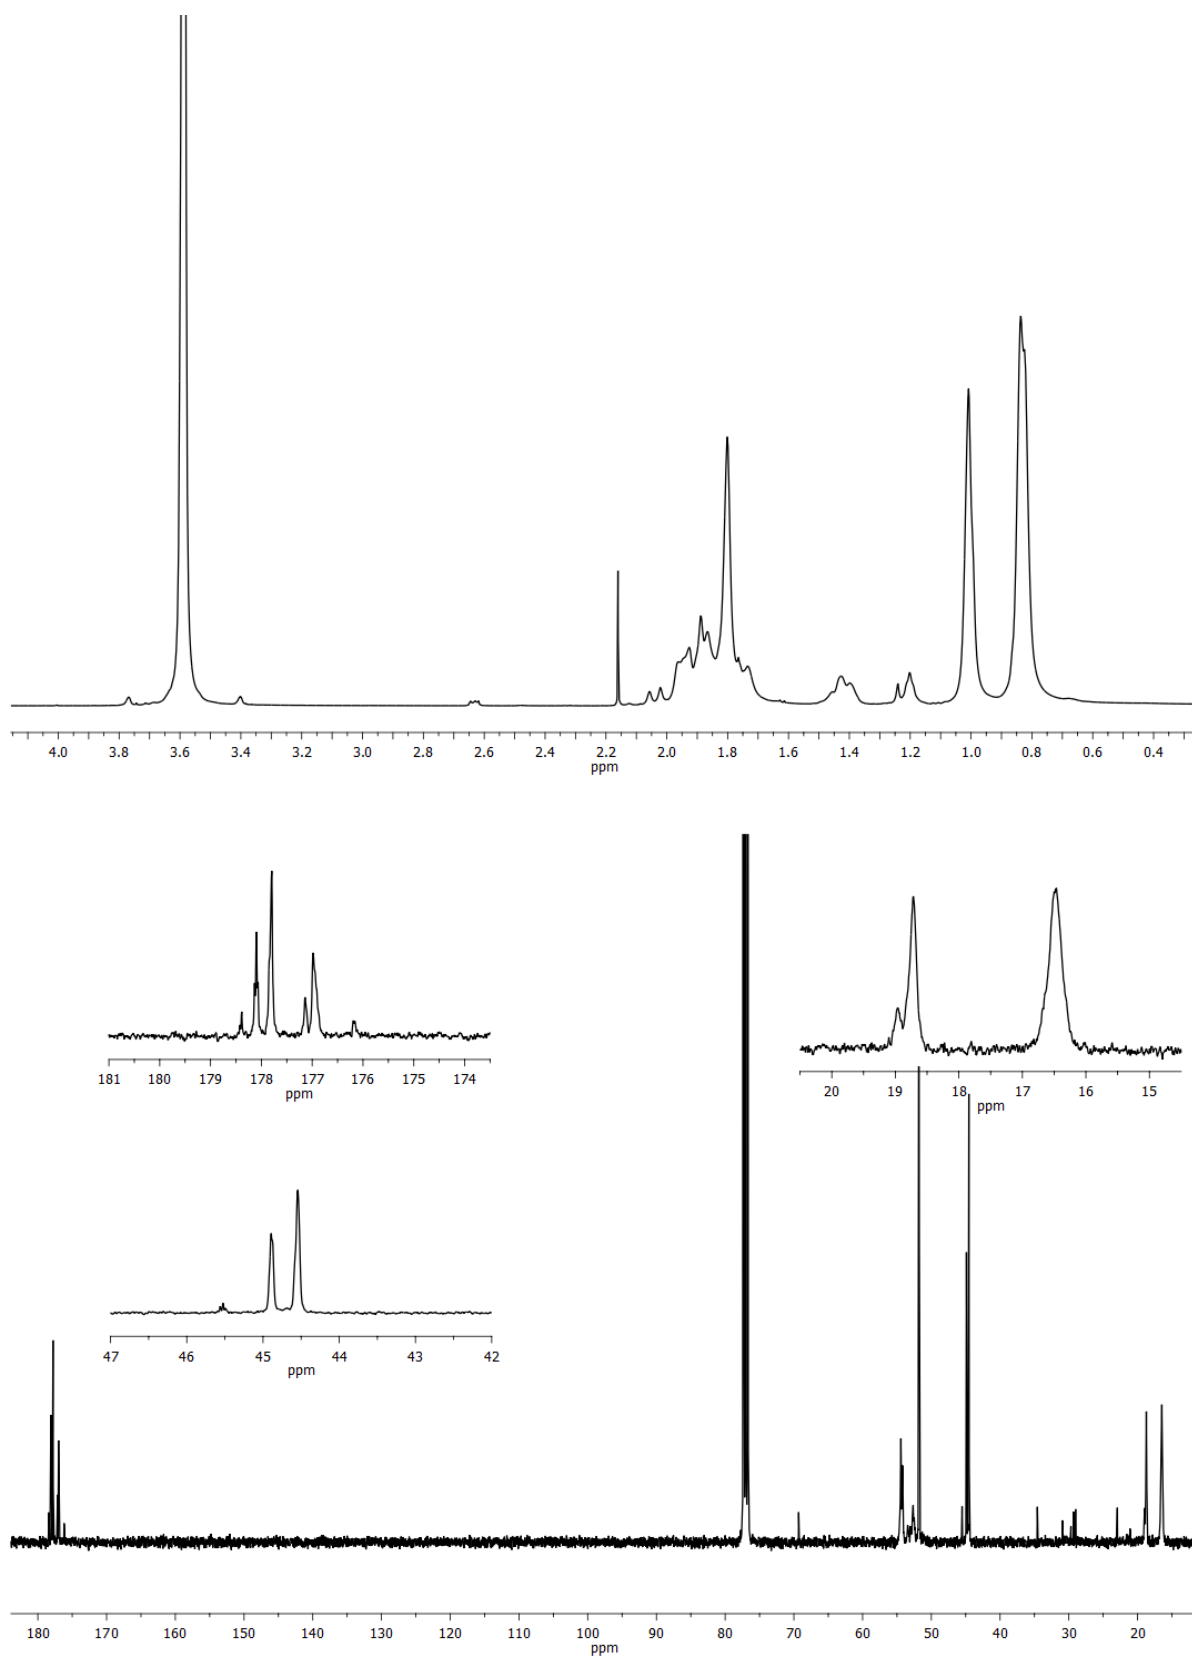

**Figure S8.**  $^1\text{H}$ - and  $^{13}\text{C}$ -NMR of PMMA prepared by the action of **6-iPr-CO<sub>2</sub>** at  $T=85^\circ\text{C}$  in DMSO.

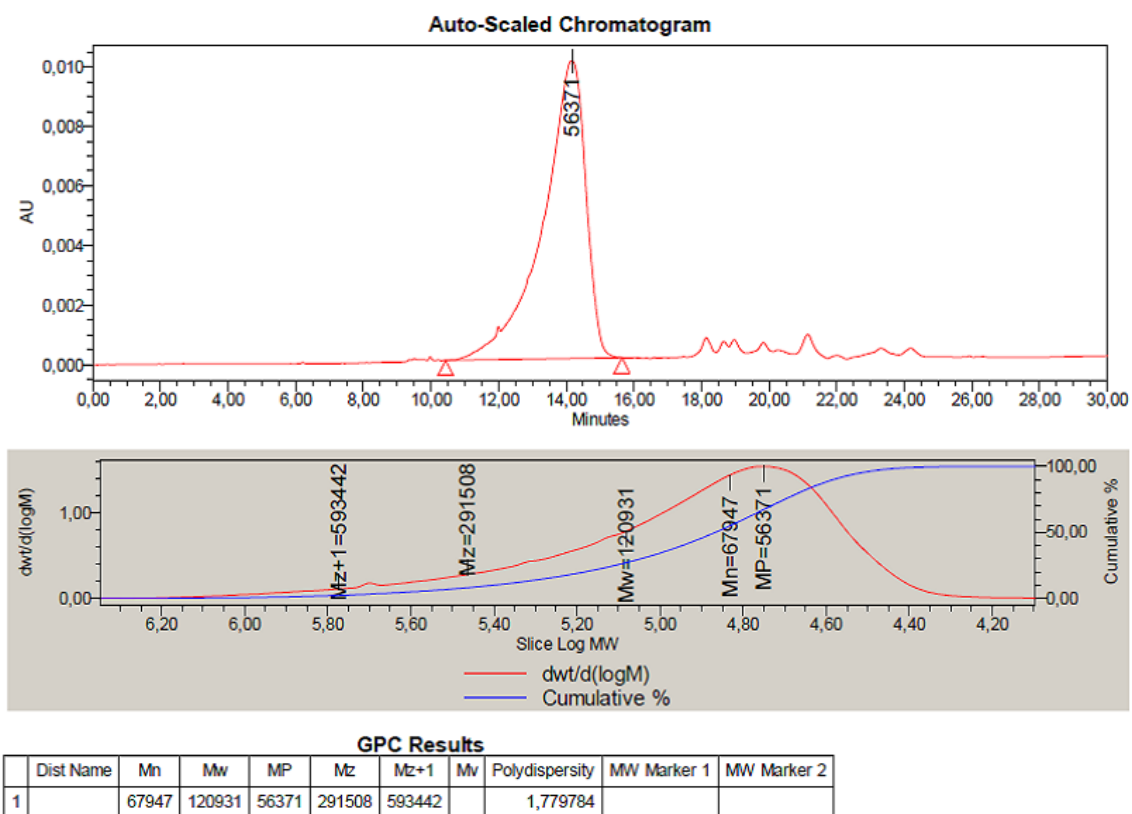

**Figure S9.** GPC-trace of PMMA obtained by the action of **6-iPr-CO<sub>2</sub>** in DMSO at 50°C.



**Table 1.** Crystal data and structure refinement for **6-Dipp-CO<sub>2</sub>**.

|                                   |                                                                                            |
|-----------------------------------|--------------------------------------------------------------------------------------------|
| Empirical formula                 | C <sub>31</sub> H <sub>44</sub> Cl <sub>4</sub> N <sub>2</sub> O <sub>2</sub>              |
| Formula weight                    | 618.48                                                                                     |
| Temperature                       | 100(2) K                                                                                   |
| Wavelength                        | 71.073 nm                                                                                  |
| Crystal system, space group       | monoclinic, C 2/c                                                                          |
| Unit cell dimensions              | a = 16.2658(17) Å α = 90°.<br>b = 9.9841(11) Å β = 108.293(5)°<br>c = 21.212(2) Å γ = 90°. |
| Volume                            | 3270.7(6) Å <sup>3</sup>                                                                   |
| Z, Calculated density             | 4, 1.256 Mg/m <sup>3</sup>                                                                 |
| Absorption coefficient            | 0.391 mm <sup>-1</sup>                                                                     |
| F(000)                            | 1312                                                                                       |
| Crystal size                      | 0.32 x 0.16 x 0.14 mm                                                                      |
| Theta range for data collection   | 2.02 to 26.4°.                                                                             |
| Limiting indices                  | -19 ≤ h ≤ 20, -12 ≤ k ≤ 12, -26 ≤ l ≤ 26                                                   |
| Reflections collected / unique    | 21570 / 3320 [R(int) = 0.0400]                                                             |
| Completeness to theta = 26.42     | 98.8 %                                                                                     |
| Max. and min. transmission        | 0.9472 and 0.8850                                                                          |
| Refinement method                 | Full-matrix least-squares on F <sup>2</sup>                                                |
| Data / restraints / parameters    | 3320 / 6 / 186                                                                             |
| Goodness-of-fit on F <sup>2</sup> | 1.041                                                                                      |
| Final R indices [I > 2σ(I)]       | R1 = 0.0447, wR2 = 0.1162                                                                  |
| R indices (all data)              | R1 = 0.0614, wR2 = 0.1221                                                                  |
| Largest diff. peak and hole       | 0.718 and -0.501 e.Å <sup>-3</sup>                                                         |

**Table 2.** Atomic coordinates ( $\times 10^4$ ) and equivalent isotropic displacement parameters ( $\text{\AA}^2 \times 10^3$ ) for **6-Dipp-CO<sub>2</sub>**.  $U(\text{eq})$  is defined as one third of the trace of the orthogonalized  $U_{ij}$  tensor.

|        | x        | y        | z       | U(eq) |
|--------|----------|----------|---------|-------|
| O(1)   | 732(1)   | 2495(2)  | 2672(1) | 28(1) |
| N(1)   | -50(1)   | -210(2)  | 3032(1) | 20(1) |
| C(1)   | 0        | 435(3)   | 2500    | 18(1) |
| C(2)   | -78(2)   | -1690(2) | 3062(1) | 30(1) |
| C(3)   | 318(3)   | -2292(5) | 2621(2) | 24(1) |
| C(4)   | 0        | 1987(3)  | 2500    | 20(1) |
| C(5)   | -34(2)   | 515(2)   | 3631(1) | 18(1) |
| C(6)   | -822(2)  | 913(2)   | 3713(1) | 19(1) |
| C(7)   | -780(2)  | 1560(2)  | 4306(1) | 22(1) |
| C(8)   | 7(2)     | 1787(2)  | 4792(1) | 23(1) |
| C(9)   | 772(2)   | 1376(2)  | 4696(1) | 21(1) |
| C(10)  | 773(2)   | 729(2)   | 4110(1) | 19(1) |
| C(11)  | -1696(2) | 627(3)   | 3197(1) | 25(1) |
| C(12)  | -2276(2) | 1870(3)  | 3039(1) | 34(1) |
| C(13)  | -2155(2) | -528(3)  | 3426(1) | 32(1) |
| C(14)  | 1623(2)  | 291(3)   | 4016(1) | 23(1) |
| C(15)  | 2259(2)  | 1460(3)  | 4116(2) | 38(1) |
| C(16)  | 2030(2)  | -878(3)  | 4475(1) | 32(1) |
| C(1X)  | -106(2)  | 4404(3)  | 1362(1) | 27(1) |
| Cl(1X) | 892(1)   | 5226(1)  | 1519(1) | 49(1) |
| Cl(2X) | -949(1)  | 5316(1)  | 801(1)  | 52(1) |

**Table 3.** Bond lengths [Å] and angles [°] for **6-Dipp-CO<sub>2</sub>**.

---

|             |           |
|-------------|-----------|
| O(1)-C(4)   | 1.239(2)  |
| N(1)-C(1)   | 1.325(2)  |
| N(1)-C(5)   | 1.455(3)  |
| N(1)-C(2)   | 1.480(3)  |
| C(1)-N(1)#1 | 1.324(2)  |
| C(1)-C(4)   | 1.549(5)  |
| C(2)-C(3)   | 1.425(6)  |
| C(2)-C(3)#1 | 1.503(5)  |
| C(2)-H(2A)  | 0.9958    |
| C(2)-H(2B)  | 1.0113    |
| C(2)-H(2C)  | 0.9576    |
| C(2)-H(2D)  | 0.9661    |
| C(3)-C(3)#1 | 1.002(10) |
| C(3)-C(2)#1 | 1.503(5)  |
| C(3)-H(2D)  | 1.4548    |
| C(3)-H(3A)  | 1.0156    |
| C(3)-H(3B)  | 1.0309    |
| C(4)-O(1)#1 | 1.239(2)  |
| C(5)-C(10)  | 1.401(3)  |
| C(5)-C(6)   | 1.404(3)  |
| C(6)-C(7)   | 1.396(3)  |
| C(6)-C(11)  | 1.524(3)  |
| C(7)-C(8)   | 1.387(3)  |
| C(7)-H(7)   | 0.9500    |
| C(8)-C(9)   | 1.385(3)  |
| C(8)-H(8)   | 0.9500    |
| C(9)-C(10)  | 1.401(3)  |
| C(9)-H(9)   | 0.9500    |
| C(10)-C(14) | 1.523(3)  |
| C(11)-C(12) | 1.531(4)  |
| C(11)-C(13) | 1.532(4)  |
| C(11)-H(11) | 1.0000    |

|                   |            |
|-------------------|------------|
| C(12)-H(12A)      | 0.9800     |
| C(12)-H(12B)      | 0.9800     |
| C(12)-H(12C)      | 0.9800     |
| C(13)-H(13A)      | 0.9800     |
| C(13)-H(13B)      | 0.9800     |
| C(13)-H(13C)      | 0.9800     |
| C(14)-C(15)       | 1.529(4)   |
| C(14)-C(16)       | 1.532(4)   |
| C(14)-H(14)       | 1.0000     |
| C(15)-H(15A)      | 0.9800     |
| C(15)-H(15B)      | 0.9800     |
| C(15)-H(15C)      | 0.9800     |
| C(16)-H(16A)      | 0.9800     |
| C(16)-H(16B)      | 0.9800     |
| C(16)-H(16C)      | 0.9800     |
| C(1X)-Cl(1X)      | 1.756(3)   |
| C(1X)-Cl(2X)      | 1.761(3)   |
| C(1X)-H(1X1)      | 0.9900     |
| C(1X)-H(1X2)      | 0.9900     |
|                   |            |
| C(1)-N(1)-C(5)    | 120.9(2)   |
| C(1)-N(1)-C(2)    | 122.2(2)   |
| C(5)-N(1)-C(2)    | 116.84(18) |
| N(1)#1-C(1)-N(1)  | 121.8(3)   |
| N(1)#1-C(1)-C(4)  | 119.10(15) |
| N(1)-C(1)-C(4)    | 119.10(15) |
| C(3)-C(2)-N(1)    | 111.5(3)   |
| C(3)-C(2)-C(3)#1  | 39.9(4)    |
| N(1)-C(2)-C(3)#1  | 111.1(2)   |
| C(3)-C(2)-H(2A)   | 124.8      |
| N(1)-C(2)-H(2A)   | 107.8      |
| C(3)#1-C(2)-H(2A) | 140.9      |
| C(3)-C(2)-H(2B)   | 98.1       |
| N(1)-C(2)-H(2B)   | 104.4      |

|                    |            |
|--------------------|------------|
| C(3)#1-C(2)-H(2B)  | 59.1       |
| H(2A)-C(2)-H(2B)   | 108.0      |
| C(3)-C(2)-H(2C)    | 136.1      |
| N(1)-C(2)-H(2C)    | 109.7      |
| C(3)#1-C(2)-H(2C)  | 109.8      |
| H(2A)-C(2)-H(2C)   | 52.0       |
| H(2B)-C(2)-H(2C)   | 56.9       |
| C(3)-C(2)-H(2D)    | 72.1       |
| N(1)-C(2)-H(2D)    | 109.2      |
| C(3)#1-C(2)-H(2D)  | 109.3      |
| H(2A)-C(2)-H(2D)   | 59.1       |
| H(2B)-C(2)-H(2D)   | 146.3      |
| H(2C)-C(2)-H(2D)   | 107.7      |
| C(3)#1-C(3)-C(2)   | 74.3(5)    |
| C(3)#1-C(3)-C(2)#1 | 65.8(5)    |
| C(2)-C(3)-C(2)#1   | 115.4(4)   |
| C(3)#1-C(3)-H(2D)  | 110.8      |
| C(2)-C(3)-H(2D)    | 39.2       |
| C(2)#1-C(3)-H(2D)  | 145.2      |
| C(3)#1-C(3)-H(3A)  | 60.4       |
| C(2)-C(3)-H(3A)    | 103.5      |
| C(2)#1-C(3)-H(3A)  | 98.4       |
| H(2D)-C(3)-H(3A)   | 109.8      |
| C(3)#1-C(3)-H(3B)  | 167.5      |
| C(2)-C(3)-H(3B)    | 101.1      |
| C(2)#1-C(3)-H(3B)  | 107.2      |
| H(2D)-C(3)-H(3B)   | 68.4       |
| H(3A)-C(3)-H(3B)   | 132.0      |
| O(1)-C(4)-O(1)#1   | 131.6(3)   |
| O(1)-C(4)-C(1)     | 114.19(16) |
| O(1)#1-C(4)-C(1)   | 114.19(16) |
| C(10)-C(5)-C(6)    | 123.4(2)   |
| C(10)-C(5)-N(1)    | 117.7(2)   |
| C(6)-C(5)-N(1)     | 118.8(2)   |

|                     |          |
|---------------------|----------|
| C(7)-C(6)-C(5)      | 116.9(2) |
| C(7)-C(6)-C(11)     | 120.3(2) |
| C(5)-C(6)-C(11)     | 122.7(2) |
| C(8)-C(7)-C(6)      | 121.3(2) |
| C(8)-C(7)-H(7)      | 119.4    |
| C(6)-C(7)-H(7)      | 119.4    |
| C(9)-C(8)-C(7)      | 120.3(2) |
| C(9)-C(8)-H(8)      | 119.9    |
| C(7)-C(8)-H(8)      | 119.9    |
| C(8)-C(9)-C(10)     | 121.2(2) |
| C(8)-C(9)-H(9)      | 119.4    |
| C(10)-C(9)-H(9)     | 119.4    |
| C(5)-C(10)-C(9)     | 116.9(2) |
| C(5)-C(10)-C(14)    | 122.9(2) |
| C(9)-C(10)-C(14)    | 120.2(2) |
| C(6)-C(11)-C(12)    | 112.1(2) |
| C(6)-C(11)-C(13)    | 110.5(2) |
| C(12)-C(11)-C(13)   | 110.6(2) |
| C(6)-C(11)-H(11)    | 107.8    |
| C(12)-C(11)-H(11)   | 107.8    |
| C(13)-C(11)-H(11)   | 107.8    |
| C(11)-C(12)-H(12A)  | 109.5    |
| C(11)-C(12)-H(12B)  | 109.5    |
| H(12A)-C(12)-H(12B) | 109.5    |
| C(11)-C(12)-H(12C)  | 109.5    |
| H(12A)-C(12)-H(12C) | 109.5    |
| H(12B)-C(12)-H(12C) | 109.5    |
| C(11)-C(13)-H(13A)  | 109.5    |
| C(11)-C(13)-H(13B)  | 109.5    |
| H(13A)-C(13)-H(13B) | 109.5    |
| C(11)-C(13)-H(13C)  | 109.5    |
| H(13A)-C(13)-H(13C) | 109.5    |
| H(13B)-C(13)-H(13C) | 109.5    |
| C(10)-C(14)-C(15)   | 111.4(2) |

|                     |            |
|---------------------|------------|
| C(10)-C(14)-C(16)   | 111.3(2)   |
| C(15)-C(14)-C(16)   | 110.8(2)   |
| C(10)-C(14)-H(14)   | 107.7      |
| C(15)-C(14)-H(14)   | 107.7      |
| C(16)-C(14)-H(14)   | 107.7      |
| C(14)-C(15)-H(15A)  | 109.5      |
| C(14)-C(15)-H(15B)  | 109.5      |
| H(15A)-C(15)-H(15B) | 109.5      |
| C(14)-C(15)-H(15C)  | 109.5      |
| H(15A)-C(15)-H(15C) | 109.5      |
| H(15B)-C(15)-H(15C) | 109.5      |
| C(14)-C(16)-H(16A)  | 109.5      |
| C(14)-C(16)-H(16B)  | 109.5      |
| H(16A)-C(16)-H(16B) | 109.5      |
| C(14)-C(16)-H(16C)  | 109.5      |
| H(16A)-C(16)-H(16C) | 109.5      |
| H(16B)-C(16)-H(16C) | 109.5      |
| Cl(1X)-C(1X)-Cl(2X) | 111.34(14) |
| Cl(1X)-C(1X)-H(1X1) | 109.4      |
| Cl(2X)-C(1X)-H(1X1) | 109.4      |
| Cl(1X)-C(1X)-H(1X2) | 109.4      |
| Cl(2X)-C(1X)-H(1X2) | 109.4      |
| H(1X1)-C(1X)-H(1X2) | 108.0      |

---

Symmetry transformations used to generate equivalent atoms: #1 -x,y,-z+1/2

**Table 4.** Anisotropic displacement parameters ( $\text{\AA}^2 \times 10^3$ ) for **6-Dipp-CO<sub>2</sub>**. The anisotropic displacement factor exponent takes the form:  $-2 \Pi^2 [h^2 a^{*2} U_{11} + \dots + 2 h k a^* b^* U_{12}]$

|        | U11   | U22   | U33   | U23   | U13   | U12    |
|--------|-------|-------|-------|-------|-------|--------|
| O(1)   | 37(1) | 20(1) | 29(1) | -4(1) | 15(1) | -7(1)  |
| N(1)   | 31(1) | 15(1) | 14(1) | -1(1) | 7(1)  | -3(1)  |
| C(1)   | 21(2) | 17(2) | 17(2) | 0     | 6(1)  | 0      |
| C(2)   | 53(2) | 15(1) | 20(1) | 0(1)  | 10(1) | -5(1)  |
| C(3)   | 34(3) | 18(2) | 20(3) | 1(2)  | 8(2)  | -3(2)  |
| C(4)   | 36(2) | 15(2) | 14(2) | 0     | 14(1) | 0      |
| C(5)   | 29(1) | 13(1) | 14(1) | 1(1)  | 8(1)  | -5(1)  |
| C(6)   | 24(1) | 17(1) | 18(1) | 4(1)  | 7(1)  | -4(1)  |
| C(7)   | 27(1) | 20(1) | 21(1) | 1(1)  | 11(1) | -3(1)  |
| C(8)   | 33(1) | 20(1) | 17(1) | -1(1) | 10(1) | -3(1)  |
| C(9)   | 25(1) | 20(1) | 17(1) | 0(1)  | 5(1)  | -5(1)  |
| C(10)  | 26(1) | 15(1) | 17(1) | 2(1)  | 9(1)  | -3(1)  |
| C(11)  | 25(1) | 28(1) | 19(1) | 0(1)  | 4(1)  | -6(1)  |
| C(12)  | 28(1) | 36(2) | 34(2) | 3(1)  | 1(1)  | -2(1)  |
| C(13)  | 32(2) | 34(2) | 29(1) | -1(1) | 7(1)  | -13(1) |
| C(14)  | 25(1) | 26(1) | 20(1) | -3(1) | 9(1)  | -2(1)  |
| C(15)  | 32(2) | 38(2) | 53(2) | -5(1) | 24(1) | -9(1)  |
| C(16)  | 31(1) | 33(2) | 32(1) | 4(1)  | 10(1) | 6(1)   |
| C(1X)  | 31(1) | 18(1) | 33(1) | 1(1)  | 11(1) | -1(1)  |
| Cl(1X) | 29(1) | 27(1) | 85(1) | -3(1) | 11(1) | -2(1)  |
| Cl(2X) | 35(1) | 43(1) | 67(1) | 15(1) | -2(1) | 1(1)   |



**Table 5.** Hydrogen coordinates ( $\times 10^4$ ) and isotropic displacement parameters ( $\text{Å}^2 \times 10^3$ ) for **6-Dipp-CO<sub>2</sub>**.

|        | x     | y     | z    | U(eq) |
|--------|-------|-------|------|-------|
| H(2A)  | 36    | -1951 | 3535 | 44    |
| H(2B)  | -700  | -1925 | 2812 | 44    |
| H(2C)  | -488  | -1959 | 3277 | 44    |
| H(2D)  | 483   | -2019 | 3324 | 44    |
| H(3A)  | 0     | -3177 | 2500 | 36    |
| H(3B)  | 961   | -2070 | 2856 | 36    |
| H(7)   | -1299 | 1849  | 4378 | 26    |
| H(8)   | 21    | 2226  | 5193 | 27    |
| H(9)   | 1306  | 1535  | 5034 | 25    |
| H(11)  | -1587 | 341   | 2778 | 29    |
| H(12A) | -2430 | 2131  | 3433 | 51    |
| H(12B) | -2804 | 1669  | 2674 | 51    |
| H(12C) | -1965 | 2607  | 2909 | 51    |
| H(13A) | -1798 | -1337 | 3485 | 48    |
| H(13B) | -2716 | -695  | 3090 | 48    |
| H(13C) | -2243 | -290  | 3848 | 48    |
| H(14)  | 1493  | -27   | 3547 | 28    |
| H(15A) | 1984  | 2201  | 3823 | 57    |
| H(15B) | 2776  | 1169  | 4011 | 57    |
| H(15C) | 2425  | 1758  | 4580 | 57    |
| H(16A) | 2156  | -598  | 4939 | 48    |
| H(16B) | 2568  | -1151 | 4397 | 48    |
| H(16C) | 1625  | -1634 | 4385 | 48    |
| H(1X1) | -236  | 4286  | 1785 | 32    |
| H(1X2) | -70   | 3504  | 1177 | 32    |

**Table 6.** Torsion angles [°] for **6-Dipp-CO<sub>2</sub>**.

---

|                         |            |
|-------------------------|------------|
| C(5)-N(1)-C(1)-N(1)#1   | 175.0(2)   |
| C(2)-N(1)-C(1)-N(1)#1   | -1.75(17)  |
| C(5)-N(1)-C(1)-C(4)     | -5.0(2)    |
| C(2)-N(1)-C(1)-C(4)     | 178.25(17) |
| C(1)-N(1)-C(2)-C(3)     | 25.4(4)    |
| C(5)-N(1)-C(2)-C(3)     | -151.4(3)  |
| C(1)-N(1)-C(2)-C(3)#1   | -17.6(4)   |
| C(5)-N(1)-C(2)-C(3)#1   | 165.6(3)   |
| N(1)-C(2)-C(3)-C(3)#1   | -97.6(3)   |
| N(1)-C(2)-C(3)-C(2)#1   | -44.8(4)   |
| C(3)#1-C(2)-C(3)-C(2)#1 | 52.8(4)    |
| N(1)#1-C(1)-C(4)-O(1)   | -85.70(14) |
| N(1)-C(1)-C(4)-O(1)     | 94.31(14)  |
| N(1)#1-C(1)-C(4)-O(1)#1 | 94.31(13)  |
| N(1)-C(1)-C(4)-O(1)#1   | -85.69(14) |
| C(1)-N(1)-C(5)-C(10)    | -90.8(2)   |
| C(2)-N(1)-C(5)-C(10)    | 86.1(3)    |
| C(1)-N(1)-C(5)-C(6)     | 91.8(2)    |
| C(2)-N(1)-C(5)-C(6)     | -91.4(3)   |
| C(10)-C(5)-C(6)-C(7)    | 0.3(3)     |
| N(1)-C(5)-C(6)-C(7)     | 177.6(2)   |
| C(10)-C(5)-C(6)-C(11)   | -177.7(2)  |
| N(1)-C(5)-C(6)-C(11)    | -0.5(3)    |
| C(5)-C(6)-C(7)-C(8)     | -0.4(3)    |
| C(11)-C(6)-C(7)-C(8)    | 177.7(2)   |
| C(6)-C(7)-C(8)-C(9)     | 0.2(4)     |
| C(7)-C(8)-C(9)-C(10)    | 0.2(4)     |
| C(6)-C(5)-C(10)-C(9)    | 0.0(3)     |
| N(1)-C(5)-C(10)-C(9)    | -177.3(2)  |
| C(6)-C(5)-C(10)-C(14)   | 180.0(2)   |
| N(1)-C(5)-C(10)-C(14)   | 2.7(3)     |
| C(8)-C(9)-C(10)-C(5)    | -0.3(3)    |

|                        |           |
|------------------------|-----------|
| C(8)-C(9)-C(10)-C(14)  | 179.8(2)  |
| C(7)-C(6)-C(11)-C(12)  | 49.9(3)   |
| C(5)-C(6)-C(11)-C(12)  | -132.1(2) |
| C(7)-C(6)-C(11)-C(13)  | -74.0(3)  |
| C(5)-C(6)-C(11)-C(13)  | 104.0(3)  |
| C(5)-C(10)-C(14)-C(15) | 125.9(3)  |
| C(9)-C(10)-C(14)-C(15) | -54.2(3)  |
| C(5)-C(10)-C(14)-C(16) | -109.9(3) |
| C(9)-C(10)-C(14)-C(16) | 70.0(3)   |

---

Symmetry transformations used to generate equivalent atoms: #1 -x,y,-z+1/2.
